# Supplementary material for: Raman spectroscopic studies and DFT calculations on NaCH3CO2and NaCD3CO2solutions in water and heavy water
Source: Royal Society of Chemistry journal article supplement (doi:10.1039/c5ra01156f), 2015-01-01
Supplement: c5ra01156f1.pdf [file c5ra01156f1.pdf]

## Supplementary Material

**Table S1.** Geometrical parameters for the cluster  $\text{CH}_3\text{CO}_2^- \cdot n\text{H}_2\text{O} \cdot m\text{H}_2\text{O}$ ; bond lengths  $a_{ij}$  (in Å), angles  $\alpha_{ijk}$  and dihedral angle  $d_{4215}$  of the  $\text{CH}_3\text{CO}_2^-$  ion (see Fig. 1) derived from DFT calculations (B3LYP/ 6-311++G(3df,2pfd)).

| parameter        | $\text{CH}_3\text{CO}_2^-$<br><i>in vacuo</i> | $\text{CH}_3\text{CO}_2^-$<br>$\cdot\text{H}_2\text{O}$ | $\text{CH}_3\text{CO}_2^-$<br>$\cdot 2\text{H}_2\text{O}$ | $\text{CH}_3\text{CO}_2^-$<br>$\cdot 4\text{H}_2\text{O}$ | $\text{CH}_3\text{CO}_2^-$<br>$\cdot 5\text{H}_2\text{O}$ | $\text{CH}_3\text{CO}_2^-$<br>$\cdot 5\text{H}_2\text{O} \cdot \text{H}_2\text{O}$ |
|------------------|-----------------------------------------------|---------------------------------------------------------|-----------------------------------------------------------|-----------------------------------------------------------|-----------------------------------------------------------|------------------------------------------------------------------------------------|
| $a_{1,2}$        | 1.561                                         | 1.548                                                   | 1.542                                                     | 1.532                                                     | 1.526                                                     | 1.524                                                                              |
| $a_{2,3}$        | 1.253                                         | 1.257                                                   | 1.261                                                     | 1.259                                                     | 1.269                                                     | 1.269                                                                              |
| $a_{2,4}$        | 1.252 <sub>5</sub>                            | 1.256                                                   | 1.251                                                     | 1.257                                                     | 1.250                                                     | 1.252                                                                              |
| $a_{1,5}$        | 1.091                                         | 1.090                                                   | 1.089                                                     | 1.088                                                     | 1.087                                                     | 1.087                                                                              |
| $a_{1,6}$        | 1.093                                         | 1.092                                                   | 1.093                                                     | 1.092                                                     | 1.089                                                     | 1.089                                                                              |
| $a_{1,7}$        | 1.093                                         | 1.093                                                   | 1.091                                                     | 1.090                                                     | 1.092                                                     | 1.092                                                                              |
| $\alpha_{3,2,4}$ | 128.84°                                       | 127.78°                                                 | 127.71°                                                   | 126.06°                                                   | 125.03°                                                   | 124.74°                                                                            |
| $\alpha_{5,1,6}$ | 109.51°                                       | 109.90°                                                 | 108.87°                                                   | 108.96°                                                   | 110.55°                                                   | 110.64°                                                                            |
| $\alpha_{5,1,7}$ | 109.51°                                       | 109.26°                                                 | 110.29°                                                   | 110.33°                                                   | 108.88°                                                   | 108.75°                                                                            |
| $\alpha_{6,1,7}$ | 107.03°                                       | 107.13°                                                 | 107.28°                                                   | 107.31°                                                   | 107.18°                                                   | 107.29°                                                                            |
| $d_{4,2,1,5}$    | 0°                                            | 0°                                                      | -13.07°                                                   | -12.66°                                                   | 14.71°                                                    | 17.31°                                                                             |
|                  |                                               |                                                         |                                                           |                                                           |                                                           |                                                                                    |
| $a_{3,10}$       | -                                             | 1.991                                                   | -                                                         | -                                                         | -                                                         | -                                                                                  |
| $a_{4,9}$        | -                                             | 2.014                                                   | 1.830                                                     | 1.758                                                     | 1.756                                                     | 1.686                                                                              |
| $a_{3,12}$       | -                                             | -                                                       | 1.674                                                     | 1.903                                                     | 2.032                                                     | 2.020                                                                              |
| $a_{4,15}$       | -                                             | -                                                       | -                                                         | 1.984                                                     | 2.016                                                     | 1.963                                                                              |
| $a_{3,18}$       | -                                             | -                                                       | -                                                         | 1.945                                                     | 1.947                                                     | 1.924                                                                              |
| $a_{3,21}$       | -                                             | -                                                       | -                                                         | -                                                         | 1.781                                                     | 1.789                                                                              |

n.a. = not applicable

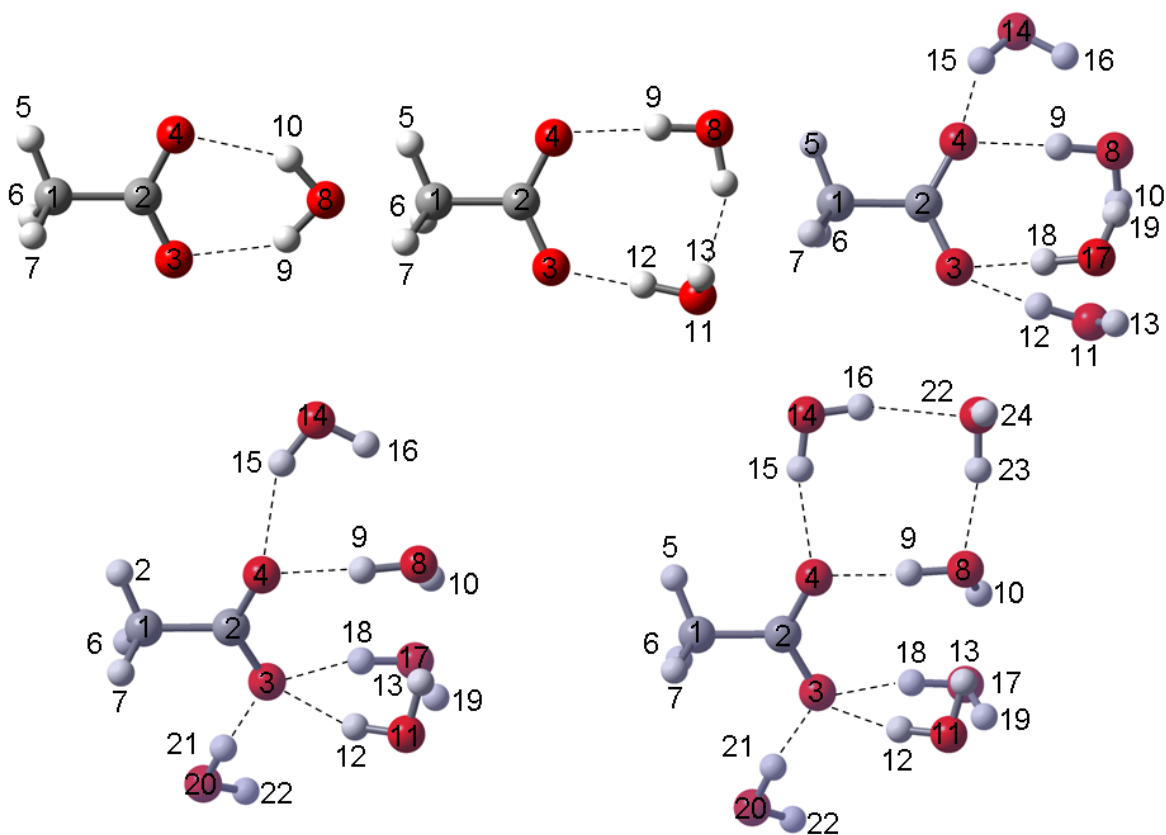

**Figure S1.** Five selected acetate-water clusters with different numbers of water molecules;  $\text{CH}_3\text{CO}_2^- \cdot n\text{H}_2\text{O} \cdot m\text{H}_2\text{O}$  ( $n = 1-5$ ,  $m=1$ ).

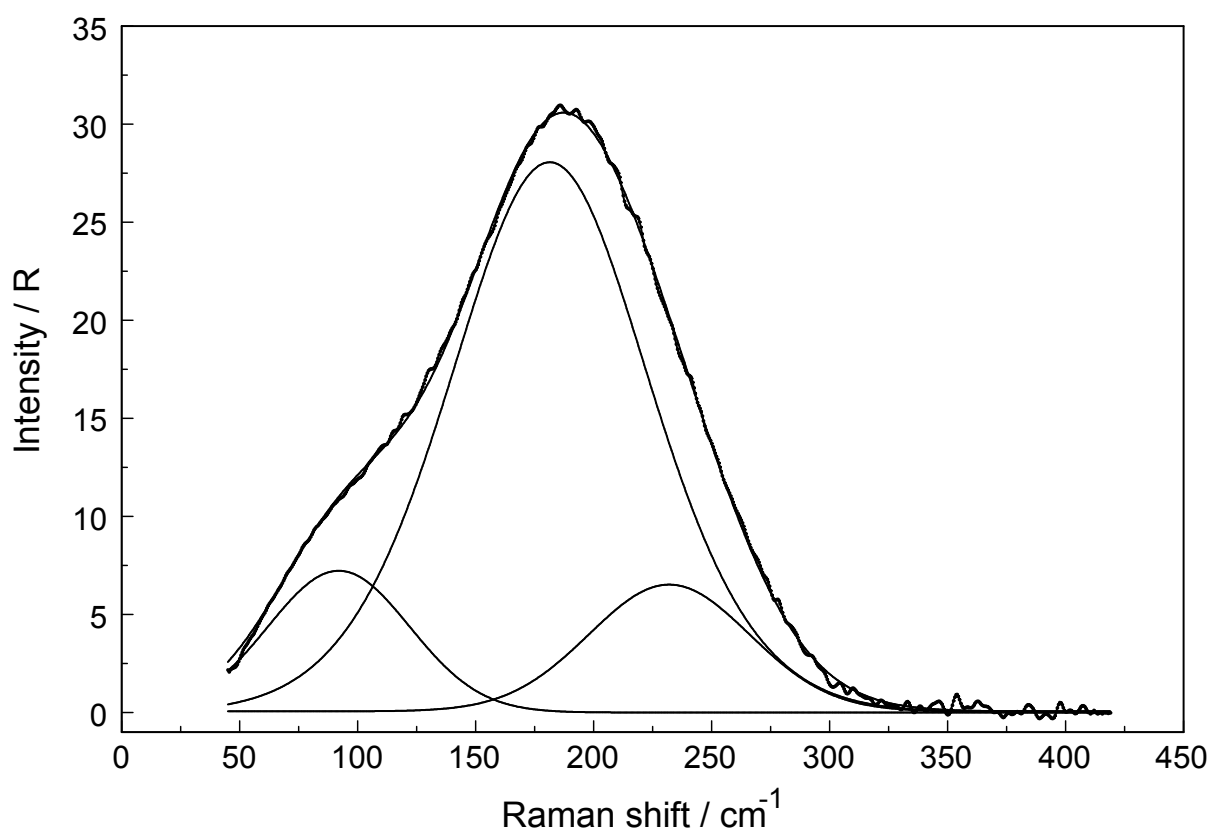

**Figure S2.** Band fit of the isotropic Raman profile of NaCH<sub>3</sub>CO<sub>2</sub>(D<sub>2</sub>O) at 3.944 mol·L<sup>-1</sup>. Given are also the band components at 90 cm<sup>-1</sup>, the restricted bending mode at 181 cm<sup>-1</sup>, the Na-O breathing mode of the Na<sup>+</sup>(D<sub>2</sub>O) and at 233 cm<sup>-1</sup> the stretching mode of the restricted stretch,  $\nu_s$  O-D···O, reflecting the D-bonds between oxygen atoms of the -CO<sub>2</sub><sup>-</sup> group and D<sub>2</sub>O.

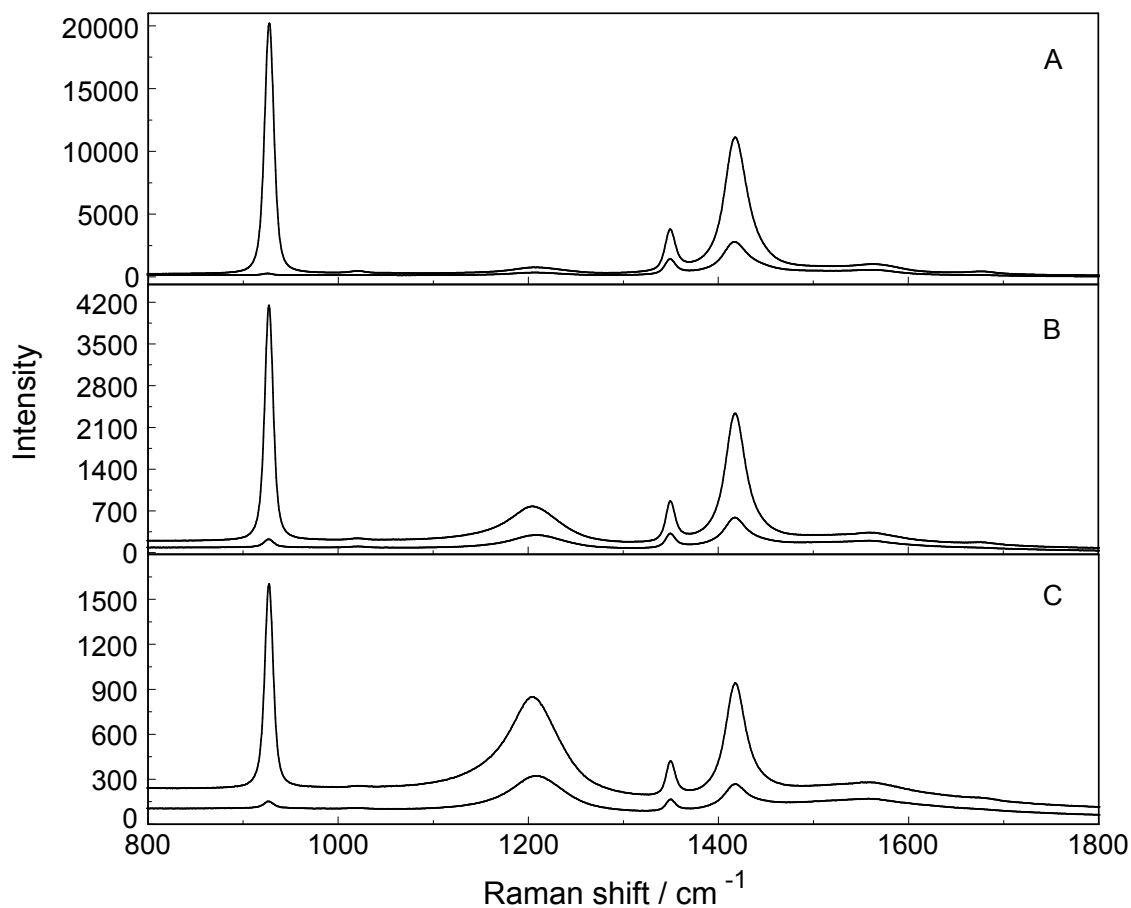

**Figure S3.** Raman spectroscopic concentration profile of  $\text{NaCH}_3\text{CO}_2(\text{D}_2\text{O})$ : A)  $3.944 \text{ mol}\cdot\text{L}^{-1}$ , B)  $0.789 \text{ mol}\cdot\text{L}^{-1}$ , C)  $0.263 \text{ mol}\cdot\text{L}^{-1}$ . Given are the polarized and depolarized spectra. The broad band at  $1206 \text{ cm}^{-1}$  is assigned to the deformation mode of heavy water. Note, that the symmetric stretching band,  $\nu_s \text{CO}_2$  at  $1414 \text{ cm}^{-1}$  shows an intrinsically asymmetric profile due to overlap with two deformation modes of the  $\text{CH}_3$  group at  $1426$  and  $1440 \text{ cm}^{-1}$ . In contrast to  $\text{NaCD}_3\text{CO}_2(\text{H}_2\text{O}/\text{D}_2\text{O})$  however, the symmetric stretching band,  $\nu_s \text{CO}_2$  at  $1408 \text{ cm}^{-1}$  shows a symmetric profile, because of the vibrational deuteration effect of the  $\text{CD}_3$  group to much lower wavenumbers. See spectrum in Figure 7.

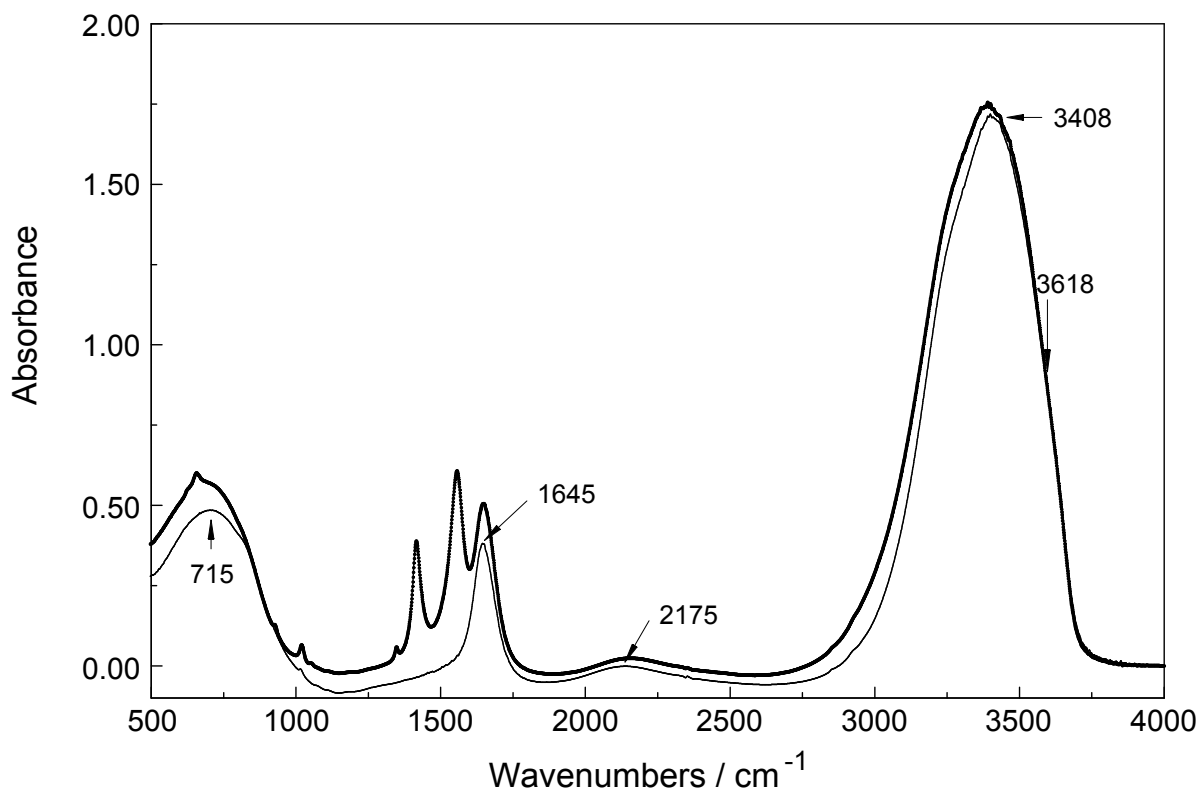

**Figure S4.** Infrared absorption spectra of neat water (lower spectrum) and of an aqueous 2.184 molL<sup>-1</sup> NaCH<sub>3</sub>CO<sub>2</sub> solution ( $R_w = 22.9$ ), (upper spectrum, presented as a thick, dark line). For the water spectrum the band positions are: broad band 715 cm<sup>-1</sup> assigned to librational band,  $\nu_L$  of H<sub>2</sub>O (in NaCH<sub>3</sub>CO<sub>2</sub>(aq)  $\nu_L$  is shifted to 690 cm<sup>-1</sup>); band at 1645 cm<sup>-1</sup> assigned to deformation mode, the broad band at 2170 cm<sup>-1</sup> is a combination band and the O-H stretching band profile peaking at 3408 cm<sup>-1</sup> plus a shoulder at 3616 cm<sup>-1</sup>. It becomes obvious that the high frequency part of the water O-H band and from the NaCH<sub>3</sub>CO<sub>2</sub> solution are quite similar while the peak position of the O-H band of NaCH<sub>3</sub>CO<sub>2</sub>(aq) is shifted to lower frequencies, the overall O-H band profile is broadened and the band peaks at 3395 cm<sup>-1</sup>.

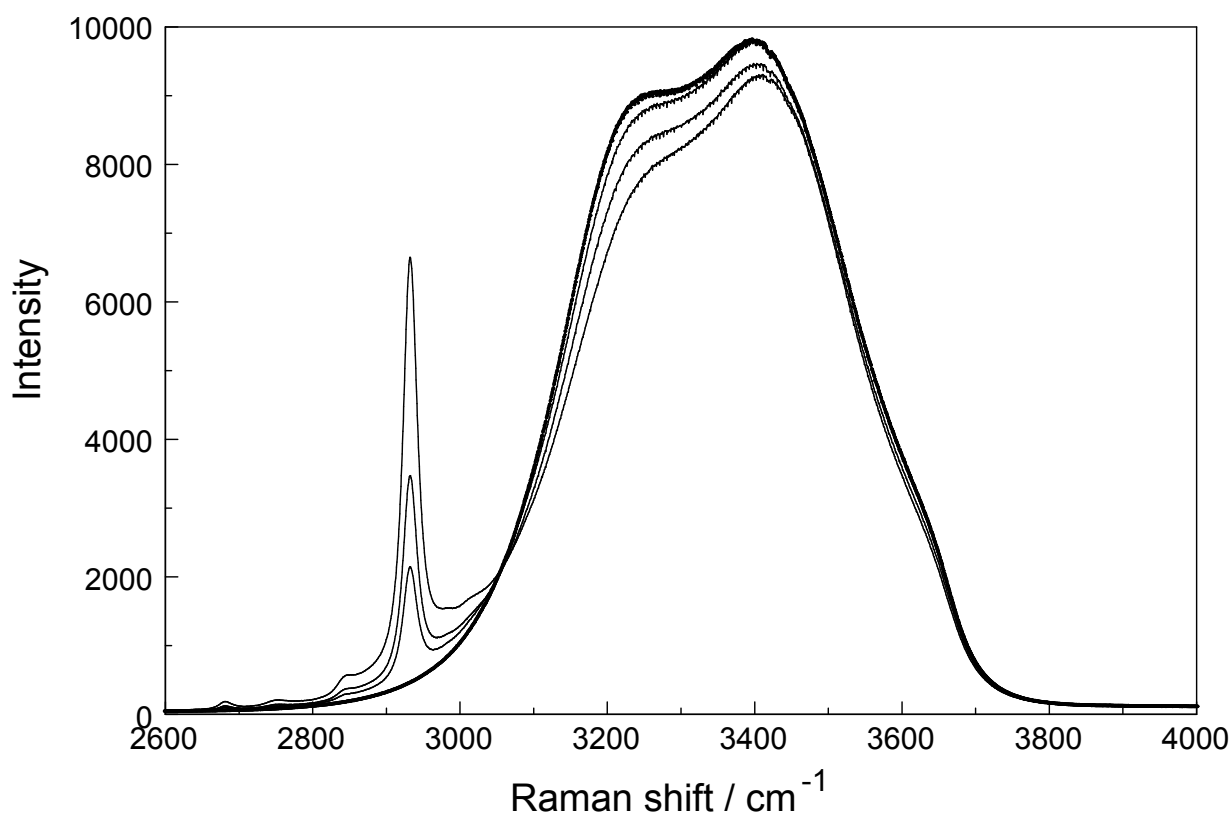

**Figure S5.** Polarized Raman profiles of three aqueous  $\text{NaCH}_3\text{CO}_2$  solutions and water. Band profiles from bottom to top: neat  $\text{H}_2\text{O}$ ,  $0.604 \text{ molL}^{-1}$ ,  $1.094 \text{ molL}^{-1}$  and  $2.208 \text{ molL}^{-1}$   $\text{NaCH}_3\text{CO}_2(\text{aq})$ . Note the C-H stretching bands at  $2935 \text{ cm}^{-1}$  of  $\text{NaCH}_3\text{CO}_2^-(\text{aq})$ , the broad O-H double band at  $3210$  and  $3430 \text{ cm}^{-1}$  as well as the broad shoulder at  $3630 \text{ cm}^{-1}$  due to the O-H stretching band profiles.

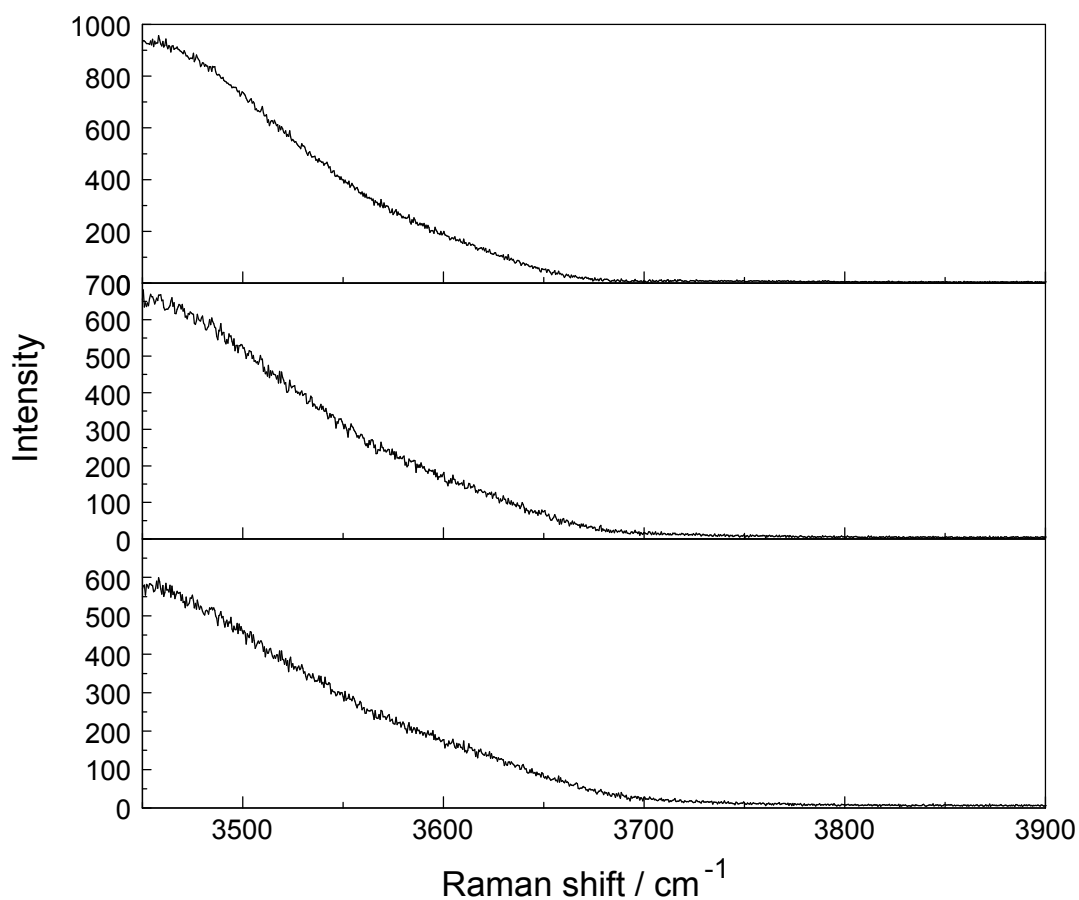

**Figure S6.** Raman difference spectra of polarized the O-H bands of  $\text{NaCH}_3\text{CO}_2(\text{aq})$  from  $0.604$  to  $2.208 \text{ molL}^{-1}$  (see also Figure S4). The water band has been subtracted from each solute spectrum. Concentration profiles at lower panel from bottom to top:  $0.604 \text{ molL}^{-1}$ ,  $1.094 \text{ molL}^{-1}$  and  $2.208 \text{ molL}^{-1}$   $\text{NaCH}_3\text{CO}_2(\text{aq})$ . Note, that there is no narrow band at  $3670 \text{ cm}^{-1}$  in contrast to the  $\text{NaCF}_3\text{CO}_2(\text{aq})$  detectable (see Figure S7).

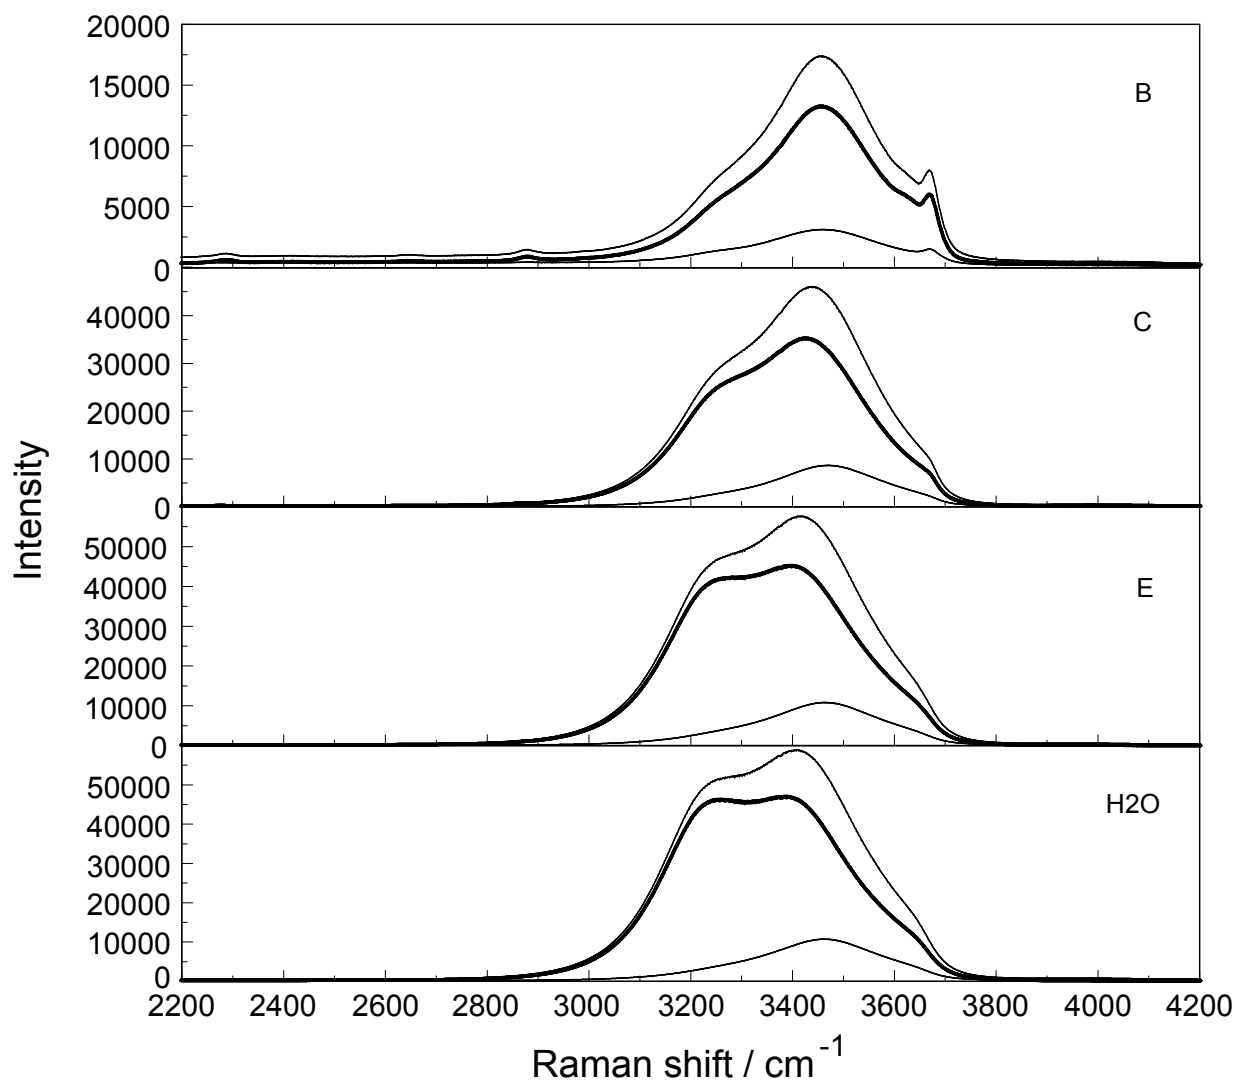

**Figure S7.** Raman scattering profiles of the O-H band region (polarized, depolarized and isotropic (thick black line)) of  $\text{NaCF}_3\text{CO}_2(\text{aq})$  from 0 to  $9.45 \text{ molL}^{-1}$ . (From bottom to top: neat water, E)  $0.850 \text{ molL}^{-1}$ , C)  $3.554 \text{ molL}^{-1}$ , B)  $9.45 \text{ molL}^{-1}$ . Note the evolving narrow band at  $3670 \text{ cm}^{-1}$  in the  $\text{CF}_3\text{CO}_2^-(\text{aq})$  scattering profiles.



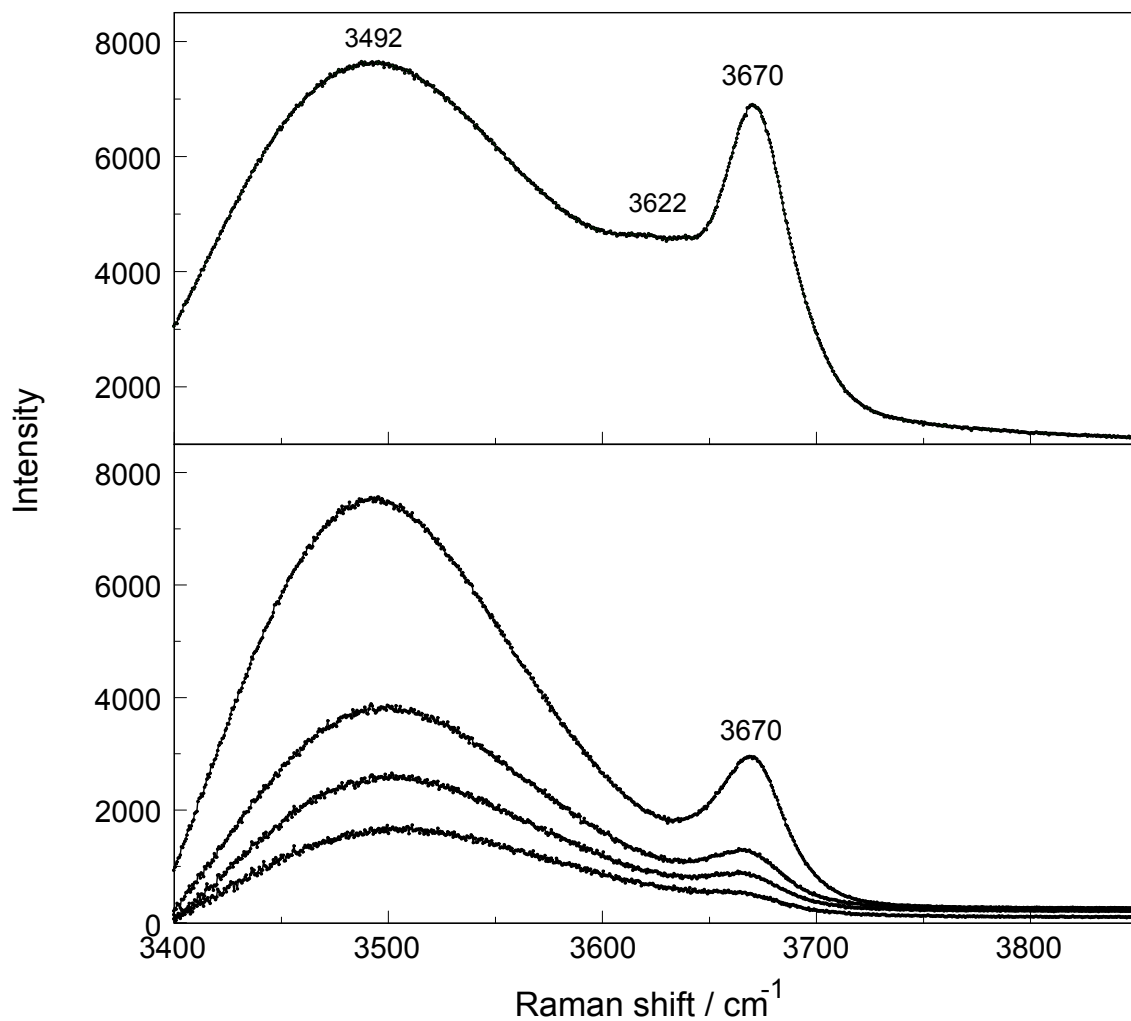

**Figure S8.** Raman difference spectra of the polarized O-H band region of  $\text{NaCF}_3\text{CO}_2(\text{aq})$  from 0 to  $9.45 \text{ molL}^{-1}$  (see also Figure S6). The water band has been subtracted from each solute spectrum. Concentration profiles at lower panel from bottom to top: neat water,  $0.427 \text{ molL}^{-1}$ ,  $0.850 \text{ molL}^{-1}$ ;  $1.424 \text{ molL}^{-1}$  and  $3.554 \text{ molL}^{-1}$  and upper panel hydrate melt  $9.45 \text{ molL}^{-1}$ . Note the evolving narrow band at  $3670 \text{ cm}^{-1}$  in the trifluoroacetate scattering profiles.
